# Supplementary material for: Systematics of the ant genus Proceratium Roger (Hymenoptera, Formicidae, Proceratiinae) in China – with descriptions of three new species based on micro-CT enhanced next-generation-morphology
Source: Zookeys. 2018 Jun 4;(770):137–92. doi: 10.3897/zookeys.770.24908 (PMC6041363; doi:10.3897/zookeys.770.24908)
Supplement: Supplementary material 1 — Table S1 [file zookeys-770-137-s001.xlsx]

## Sheet: Tabelle1
Species	Clade	Authority	Status	CASENT-Identifier	Collection-Identifier	Collection code	Housed in	Status in this study	Locality	Coordinates_Lat	Coordinates_Long	Elevation [m]	Collection Date	Collector
Proceratium malesianum	itoi	de Andrade, 2003	Holotype	CASENT0911226	NA	#20	MHNG	Antweb	Malaysia: Pahang, Ringlet	NA	NA	1250	26-III-1993	Löbl & Calame
Proceratium malesianum	itoi	de Andrade, 2003	Non-type	CASENT0281859	BMNH(E)1018055	#196	BMNH	Examined	Malaysia: Pahang, Cameron Highlands, Gunung Jasar	NA	NA	1720	25-III-1993	Löbl & Calame
Proceratium williamsi	itoi	Mathew & Tiwari, 2000	Non-type	CASENT0281860	BMNH(E)1018056	NA	BMNH	Examined	India: Meghalaya, Khasi Hills, Shillong	NA	NA	NA	28-IV-1978	R. Mathew
Proceratium williamsi	itoi	Mathew & Tiwari, 2000	Holotype of Proceratium buthanense (junior synonym of P. williamsi)	CASENT0915311	NA	NA	NHMB	Antweb	Bhutan: Phuntsholing	NA	NA	NA	15-IV-1972	Naturhistorisches Museum Basel Bhutan Expedition 1972
Proceratium deelemani	stictum	Perrault, 1981	Holotype	CASENT0915370	EY9172	NA	MNHN	Antweb	Indonesia: East Kalimantan, Balikpapan	NA	NA	NA	16-VII-1979	Christa Deeleman & Robert Deeleman
Proceratium deelemani	stictum	Perrault, 1981	Non-type	CASENT0281858	BMNH(E)1018054	#5a	BMNH	Examined	Malaysia: Sarawak, confl. Sun Oyan and Mujong river, E. Kapit	NA	NA	50	18-V-1994	Löbl & Burckhardt
Proceratium deelemani	stictum	Perrault, 1981	Non-type	CASENT0790842	NA	FHG00160	OIST	Examined	Malaysia, Sabah, Danum Valley	4.96072°N	117.80014°E	180	VIII-2010	Francisco Hita Garcia
Proceratium deelemani	stictum	Perrault, 1981	Non-type	CASENT0790847	NA	FHG00150	OIST	Examined	Malaysia, Sabah, Danum Valley	4.96072°N	117.80014°E	180	VIII-2010	Francisco Hita Garcia
Proceratium deelemani	stictum	Perrault, 1981	Non-type	CASENT0790848	NA	FHG00144	OIST	Examined	Malaysia, Sabah, Danum Valley	4.96072°N	117.80014°E	180	VIII-2010	Francisco Hita Garcia
Proceratium foveolatum	stictum	de Andrade, 2003	Holotype	CASENT0902414	BMNH(E)1015460	NA	BMNH	Examined	Malaysia: Sarawak, Gunung Mulu National Park, 4th Division	NA	NA	NA	1-X-1977	Barry Bolton
Proceratium stictum	stictum	Brown, 1958	Non-type	CASENT0106095	NA	PSW10029	UCDC	Antweb	Australia: Queensland, Cape Tribulation	16°08'S	145°26'E	10	22-I-1989	Philip S. Ward
Proceratium stictum	stictum	Brown, 1958	Non-type	CASENT0249263	NA	PSW10029	UCDC	Antweb	Australia: Queensland, Cape Tribulation	16°08'S	145°26'E	10	22-I-1989	Philip S. Ward
Abbreviations of collections
BMNH	The Natural History Museum, London, UK
ISAS	Kunming Institute of Zoology, Kunming, Yunnan, P.R. China
MHNG	Muséum d’Histoire Naturelle de la Ville de Genève, Geneva, Switzerland
MNHN	Muséum National d'Histoire Naturelle, Paris, France
NHMB	Naturhistorisches Museum Basel, Basel, Switzerland
OIST	Okinawa Institute of Science and Technology, Okinawa, Japan
UCDC	R.M. Bohart Museum of Entomology, University of California, Davis, California, USA
